# Supplementary material for: Motor self-regulation in goats (Capra aegagrus hircus) in a detour-reaching task
Source: PeerJ. 2018 Jul 5;6:e5139. doi: 10.7717/peerj.5139 (PMC6035861; doi:10.7717/peerj.5139)
Supplement: Supplemental Information 1 [file peerj-06-5139-s001.xlsx]

## Sheet: dat
Test	Procedure	Animal	Trial	Reward	Latency	Accuracy	TD-cyl	Side baiting	Side
cylinder	training	0	1	1	17.333	0		right	right
cylinder	training	1	1	0		1	3.93329	right
cylinder	training	2	1	1	12.367	0		right	right
cylinder	training	3	1	1	13.767	1	1.76665	right	right
cylinder	training	4	1	1	12.3	0		right	right
cylinder	training	5	1	1	3.767	0		left	left
cylinder	training	6	1	1	54.033	0		left	left
cylinder	training	7	1	0		0		left
cylinder	training	8	1	1	15	0		left	left
cylinder	training	9	1	1	4.8	0		left	left
cylinder	training	10	1	1	8.6	0		right	left
cylinder	training	11	1	0		1	2.96663	right
cylinder	training	12	1	1	11.4	0		right	left
cylinder	training	13	1	1	16.533	0		right	left
cylinder	training	14	1	1	17.8	0		right	right
cylinder	training	15	1	1	33.533	0		right	left
cylinder	training	17	1	1	4.333	0		left	right
cylinder	training	19	1	1	4.0333	0		left	left
cylinder	training	20	1	1	4.2	0		left	left
cylinder	training	21	1	1	7.134	0		left	right
cylinder	training	0	2	1	9.066	0		left	right
cylinder	training	1	2	1	53.9997	1	0.866658	left	left
cylinder	training	2	2	1	22	0		left	right
cylinder	training	3	2	1	30.733	0		left	right
cylinder	training	4	2	1	4.933	0		left	right
cylinder	training	5	2	1	16.499	0		right	left
cylinder	training	6	2	1	5.5666	0		right	right
cylinder	training	7	2	1	25.233	0		right	left
cylinder	training	8	2	1	2.966	0		right	right
cylinder	training	9	2	1	7.3	0		right	left
cylinder	training	10	2	1	41.567	1	0.399996	left	left
cylinder	training	11	2	0		0		left
cylinder	training	12	2	1	11.567	0		left	right
cylinder	training	13	2	1	9.6999	0		left	left
cylinder	training	14	2	1	10.667	1	1.33332	left	left
cylinder	training	15	2	1	2.9	0		left	left
cylinder	training	17	2	1	3.6	0		right	right
cylinder	training	19	2	0		1	2.19998	right
cylinder	training	20	2	1	9	0		right	left
cylinder	training	21	2	1	10.633	0		right	left
cylinder	training	0	3	1	8.634	0		left	left
cylinder	training	1	3	1	13	0		left	left
cylinder	training	2	3	1	3.633	0		left	right
cylinder	training	3	3	1	15.5665	1	2.33331	left	right
cylinder	training	4	3	1	6.7	0		left	left
cylinder	training	5	3	1	4.267	0		right	left
cylinder	training	6	3	1	3.133	0		right	right
cylinder	training	7	3	1	8.367	0		right	left
cylinder	training	8	3	1	3.433	0		right	right
cylinder	training	9	3	1	10.734	0		right	left
cylinder	training	10	3	1	2.666	0		left	left
cylinder	training	11	3	1	60.099	0		left	left
cylinder	training	12	3	0		1	3.49997	left
cylinder	training	13	3	1	10.033	1	2.49998	left	right
cylinder	training	14	3	1	3.3	0		left	left
cylinder	training	15	3	1	2.733	0		left	left
cylinder	training	17	3	1	3.367	0		right	right
cylinder	training	19	3	0		1	0.66666	right
cylinder	training	20	3	1	2.966	0		right	left
cylinder	training	21	3	1	6.7	0		right	left
cylinder	training	0	4	1	8.5	0		right	right
cylinder	training	1	4	1	8.6999	0		left	left
cylinder	training	2	4	1	3.3	0		right	right
cylinder	training	3	4	1	8.7	0		right	left
cylinder	training	4	4	1	8.434	0		right	right
cylinder	training	5	4	1	3.767	0		left	left
cylinder	training	6	4	1	4.1	0		left	right
cylinder	training	7	4	1	3.834	0		left	left
cylinder	training	8	4	1	2.534	0		left	right
cylinder	training	9	4	1	4.5	0		left	left
cylinder	training	10	4	1	7.167	0		right	left
cylinder	training	11	4	1	7.533	0		right	left
cylinder	training	12	4	1	37.566	0		right	left
cylinder	training	13	4	1	4	0		right	right
cylinder	training	14	4	1	21.866	0		right	left
cylinder	training	15	4	1	3.667	0		right	left
cylinder	training	17	4	1	10.7329	0		left	right
cylinder	training	19	4	1	27.966	1	1.33332	left	left
cylinder	training	20	4	1	67.132	0		left	right
cylinder	training	21	4	1	3.9333	0		left	right
cylinder	training	0	5	1	8.633	0		right	right
cylinder	training	1	5	1	3.7	0		right	left
cylinder	training	2	5	1	3.2	0		right	right
cylinder	training	3	5	1	8.733	1	0.966657	right	right
cylinder	training	4	5	1	6.4	1	1.83332	right	right
cylinder	training	5	5	1	3.733	0		left	left
cylinder	training	6	5	1	3.5	0		left	left
cylinder	training	7	5	1	5.533	0		left	left
cylinder	training	8	5	1	3.7	0		left	right
cylinder	training	9	5	1	2.733	0		left	left
cylinder	training	10	5	1	3.5666	0		left	left
cylinder	training	11	5	1	7.266	0		left	left
cylinder	training	12	5	1	29.233	1	0.699993	left	right
cylinder	training	13	5	1	5.333	0		left	right
cylinder	training	14	5	0		0		left
cylinder	training	15	5	1	2.4	0		left	left
cylinder	training	17	5	1	3.1333	0		right	right
cylinder	training	19	5	1	36.566	0		right	left
cylinder	training	20	5	1	16.599	0		right	left
cylinder	training	21	5	1	5.133	1	0.643327	right	right
cylinder	training	0	6	1	9.367	0		left	right
cylinder	training	1	6	1	3.533	0		left	left
cylinder	training	2	6	1	3.334	0		left	right
cylinder	training	3	6	1	10.267	0		left	right
cylinder	training	4	6	1	3.567	0		left	right
cylinder	training	5	6	1	3.6666	0		right	left
cylinder	training	6	6	1	5.5	0		right	left
cylinder	training	7	6	1	3.6	0		right	left
cylinder	training	8	6	1	10.066	0		right	right
cylinder	training	9	6	1	5.467	0		right	left
cylinder	training	10	6	1	3.7	0		right	left
cylinder	training	11	6	1	4.366	0		right	left
cylinder	training	12	6	0		1	0.399996	right
cylinder	training	13	6	1	6.333	0		right	right
cylinder	training	14	6	1	35.666	1	1.9999	right	right
cylinder	training	15	6	1	4.2	0		right	left
cylinder	training	17	6	1	3.633	0		left	right
cylinder	training	19	6	1	10.134	0		left	left
cylinder	training	20	6	1	6.1336	0		left	left
cylinder	training	21	6	1	10.967	0		left	right
cylinder	training	0	7	1	5.667	0		right	right
cylinder	training	1	7	1	4.7332	0		right	left
cylinder	training	2	7	1	3.533	0		right	right
cylinder	training	3	7	1	4.066	0		right	right
cylinder	training	4	7	1	2.834	0		right	right
cylinder	training	5	7	1	2.9666	0		left	left
cylinder	training	6	7	1	3.966	0		left	left
cylinder	training	7	7	1	3.667	0		left	left
cylinder	training	8	7	1	2.233	0		left	right
cylinder	training	9	7	1	3.199	0		left	left
cylinder	training	10	7	1	3.233	0		left	left
cylinder	training	11	7	1	3.7	0		left	left
cylinder	training	12	7	0		1	0.399996	left
cylinder	training	13	7	1	3.8	0		left	right
cylinder	training	14	7	0		1	2.23331	left
cylinder	training	15	7	1	2.9	0		left	left
cylinder	training	17	7	1	3.6	0		right	right
cylinder	training	19	7	1	3.5	0		right	left
cylinder	training	20	7	1	4.233	0		right	left
cylinder	training	21	7	1	7.7	0		right	right
cylinder	training	0	8	1	4.367	0		left	right
cylinder	training	1	8	1	3.5999	0		left	left
cylinder	training	2	8	1	3.933	0		left	right
cylinder	training	3	8	1	3.4	0		left	right
cylinder	training	4	8	1	3.433	0		left	right
cylinder	training	5	8	1	3.6666	0		right	left
cylinder	training	6	8	1	6.567	0		right	left
cylinder	training	7	8	1	5.2	0		right	left
cylinder	training	8	8	1	2.666	0		right	right
cylinder	training	9	8	1	4.833	0		right	left
cylinder	training	10	8	1	2.733	0		right	left
cylinder	training	11	8	1	2.833	0		right	left
cylinder	training	12	8	1	30.366	0		right	left
cylinder	training	13	8	1	3.366	0		right	right
cylinder	training	14	8	1	27.567	0		right	right
cylinder	training	15	8	1	4.533	0		right	left
cylinder	training	17	8	1	3	0		left	right
cylinder	training	19	8	1	2.8667	0		left	left
cylinder	training	20	8	1	11.8332	0		left	right
cylinder	training	21	8	1	9.3	0		left	right
cylinder	training	0	9	1	4.034	0		right	right
cylinder	training	1	9	1	3.134	0		right	left
cylinder	training	2	9	1	3.434	0		right	right
cylinder	training	3	9	1	5.233	0		right	right
cylinder	training	4	9	1	3.6	0		right	right
cylinder	training	5	9	1	3.533	0		left	left
cylinder	training	6	9	1	4.434	0		left	right
cylinder	training	7	9	1	6.333	0		left	left
cylinder	training	8	9	1	2.867	0		left	right
cylinder	training	9	9	1	3.1	0		left	left
cylinder	training	10	9	1	3.233	0		right	left
cylinder	training	11	9	1	3.0666	0		right	left
cylinder	training	12	9	0		1	0.799992	right
cylinder	training	13	9	1	3.333	0		right	right
cylinder	training	14	9	1	6.2	0		right	left
cylinder	training	15	9	1	3.734	0		right	left
cylinder	training	17	9	1	2.867	0		left	right
cylinder	training	19	9	1	3.7333	0		left	left
cylinder	training	20	9	1	2.567	0		left	left
cylinder	training	21	9	1	6.466	0		left	left
cylinder	training	0	10	1	3.466	0		right	right
cylinder	training	1	10	1	3.3666	0		right	left
cylinder	training	2	10	1	3.866	0		right	right
cylinder	training	3	10	1	5.034	0		right	right
cylinder	training	4	10	1	3.567	0		right	right
cylinder	training	5	10	1	3.533	0		left	left
cylinder	training	6	10	1	3.967	0		left	right
cylinder	training	7	10	1	3.133	0		left	left
cylinder	training	8	10	1	3.233	0		left	right
cylinder	training	9	10	1	3.567	0		left	left
cylinder	training	10	10	1	2.634	0		left	left
cylinder	training	11	10	1	3.6	0		left	left
cylinder	training	12	10	1	21.133	0		left	right
cylinder	training	13	10	1	2.9	0		left	right
cylinder	training	14	10	1	16.534	0		left	right
cylinder	training	15	10	1	2.8	0		left	left
cylinder	training	17	10	1	3.634	0		right	right
cylinder	training	19	10	1	2.567	0		right	left
cylinder	training	20	10	1	4.167	0		right	right
cylinder	training	21	10	1	10.333	0		right	right
cylinder	training	0	11	1	7.2	0		left	right
cylinder	training	1	11	1	3.4	0		left	left
cylinder	training	2	11	1	5.933	0		left	right
cylinder	training	3	11	1	5.9333	0		left	right
cylinder	training	4	11	1	3.599	0		left	right
cylinder	training	5	11	1	3.9	0		right	left
cylinder	training	6	11	1	4.967	0		right	left
cylinder	training	7	11	1	3.8	0		right	left
cylinder	training	8	11	1	3.033	0		right	right
cylinder	training	9	11	1	3.967	0		right	left
cylinder	training	10	11	1	2.7	0		left	left
cylinder	training	11	11	1	3.967	0		left	left
cylinder	training	12	11	1	26.5331	0		left	left
cylinder	training	13	11	1	2.666	0		left	right
cylinder	training	14	11	1	7.8	0		left	left
cylinder	training	15	11	1	7.6	0		left	right
cylinder	training	17	11	1	6.967	0		right	right
cylinder	training	19	11	1	5.067	0		right	left
cylinder	training	20	11	1	2.6	0		right	left
cylinder	training	21	11	1	7.334	0		right	right
cylinder	training	0	12	1	4.534	0		left	right
cylinder	training	1	12	1	3.3	0		left	left
cylinder	training	2	12	1	4.4	0		left	right
cylinder	training	3	12	1	4.4	0		left	right
cylinder	training	4	12	1	3.867	0		left	right
cylinder	training	5	12	1	9.833	0		right	left
cylinder	training	6	12	1	4.167	0		right	left
cylinder	training	7	12	1	8.134	0		right	left
cylinder	training	8	12	1	2.7	0		right	right
cylinder	training	9	12	1	3.133	0		right	left
cylinder	training	10	12	1	3.5	0		right	left
cylinder	training	11	12	1	3.667	0		right	left
cylinder	training	12	12	0		1	1.26665	right
cylinder	training	13	12	1	11.066	0		right	right
cylinder	training	14	12	1	3.9	0		right	left
cylinder	training	15	12	1	9.666	0		right	right
cylinder	training	17	12	1	3.2	0		left	left
cylinder	training	19	12	1	3.167	0		left	left
cylinder	training	20	12	1	2.6	0		left	left
cylinder	training	21	12	1	3.966	0		left	right
cylinder	training	12	13	1	6.6999	0		left	left
cylinder	training	14	13	1	15.899	0		left	left
cylinder	training	12	14	1	9.366	0		right	right
cylinder	training	12	15	1	3.3	0		right	left
cylinder	training	12	16	1	3.6	0		left	left
cylinder	test	0	1	1	33.53	0		right	right
cylinder	test	1	1	0		0		right
cylinder	test	2	1	1	31.033	1	1.53332	right	right
cylinder	test	3	1	1	36.033	1	6.7666	right	right
cylinder	test	4	1	0		1	1.26665	right
cylinder	test	5	1	1	16.6665	0		left	left
cylinder	test	6	1	1	7.5	0		left	left
cylinder	test	7	1	1	40.466	0		left	left
cylinder	test	8	1	0		0		left
cylinder	test	9	1	0		1	2.23337	left
cylinder	test	10	1	0		0		right
cylinder	test	11	1	0		1	2.33331	right
cylinder	test	12	1	1	57.066	1	9.36657	left	left
cylinder	test	13	1	0		0		left
cylinder	test	14	1	0		0		right
cylinder	test	15	1	1	55.133	1	6.53326	left	right
cylinder	test	17	1	0		0		left
cylinder	test	19	1	0		1	2.23331	left
cylinder	test	20	1	0		1	4.86662	left
cylinder	test	21	1	0		0		right
cylinder	test	0	2	1	7.066	1	2.89997	right	right
cylinder	test	1	2	0		0		right
cylinder	test	2	2	1	7.4	0		right	right
cylinder	test	3	2	1	48.9	1	2.7333	right	right
cylinder	test	4	2	0		0		right
cylinder	test	5	2	1	53.899	1	2.29998	left	left
cylinder	test	6	2	1	8	1	0.766659	left	left
cylinder	test	7	2	1	4.666	0		left	right
cylinder	test	8	2	1	7.867	0		left	right
cylinder	test	9	2	0		1	1.66665	left
cylinder	test	10	2	0		0		left
cylinder	test	11	2	0		0		left
cylinder	test	12	2	1	2.833	0		left	left
cylinder	test	13	2	0		1	1.33332	left
cylinder	test	14	2	0		0		left
cylinder	test	15	2	1	6.334	0		left	right
cylinder	test	17	2	0		0		right
cylinder	test	19	2	1	26.733	1	6.89994	right	right
cylinder	test	20	2	0		1	3.3333	right
cylinder	test	21	2	0		1	4.79995	right
cylinder	test	0	3	1	4	0		left	right
cylinder	test	1	3	0		0		left
cylinder	test	2	3	1	4.334	0		left	right
cylinder	test	3	3	1	10.9999	0		left	right
cylinder	test	4	3	1	41.1	0		left	right
cylinder	test	5	3	1	8.4	0		right	right
cylinder	test	6	3	1	3.3	0		right	left
cylinder	test	7	3	1	10.9	1	6.4666	right	left
cylinder	test	8	3	1	13.333	1	2.49998	right	right
cylinder	test	9	3	1	3.9	0		right	left
cylinder	test	10	3	0		1	1.36665	right
cylinder	test	11	3	1	60.4663	1	17.7998	right	right
cylinder	test	12	3	1	2.866	0		right	left
cylinder	test	13	3	0		1	4.53329	right
cylinder	test	14	3	0		0		right
cylinder	test	15	3	1	3.7666	0		right	right
cylinder	test	17	3	1	8.599	0		left	right
cylinder	test	19	3	1	4.5	0		left	left
cylinder	test	20	3	0		0		left
cylinder	test	21	3	0		1	0.933324	left
cylinder	test	0	4	1	4.2	1	1.26665	left	right
cylinder	test	1	4	0		1	0.766659	left
cylinder	test	2	4	1	3.5663	0		left	right
cylinder	test	3	4	1	15.4666	1	4.57536	left	right
cylinder	test	4	4	1	4.867	0		left	right
cylinder	test	5	4	1	4.333	0		right	right
cylinder	test	6	4	1	4.066	1	0.733326	right	left
cylinder	test	7	4	1	4.966	0		right	left
cylinder	test	8	4	1	7.1	0		right	right
cylinder	test	9	4	1	2.967	0		right	left
cylinder	test	10	4	0		0		left
cylinder	test	11	4	1	5.7	0		left	left
cylinder	test	12	4	1	2.634	0		left	left
cylinder	test	13	4	0		1	1.79998	left
cylinder	test	14	4	0		0		left
cylinder	test	15	4	1	5.833	0		left	right
cylinder	test	17	4	1	8.5333	1	0.499995	right	right
cylinder	test	19	4	1	3.4	0		right	left
cylinder	test	20	4	0		1	13.1665	right
cylinder	test	21	4	0		0		right
cylinder	test	0	5	1	3.966	1	0.966657	right	right
cylinder	test	1	5	1	13.6999	0		right	left
cylinder	test	2	5	1	3.2999	0		right	right
cylinder	test	3	5	1	4.1	0		right	right
cylinder	test	4	5	1	3.633	0		right	right
cylinder	test	5	5	1	4.567	0		left	right
cylinder	test	6	5	1	2.667	0		left	left
cylinder	test	7	5	1	4.366	0		left	left
cylinder	test	8	5	1	3.3	0		left	right
cylinder	test	9	5	1	2.9	0		left	left
cylinder	test	10	5	1	12.033	1	0.899991	right	left
cylinder	test	11	5	1	7	0		right	left
cylinder	test	12	5	1	2.733	0		right	left
cylinder	test	13	5	1	11.6999	0		right	left
cylinder	test	14	5	0		1	1.36665	right
cylinder	test	15	5	1	25.866	1	21.3665	right	right
cylinder	test	17	5	1	15.4	1	7.69992	left	right
cylinder	test	19	5	1	2.598	0		left	left
cylinder	test	20	5	1	11.3003	0		left	left
cylinder	test	21	5	0		1	0.733326	left
cylinder	test	0	6	1	3.166	1	0.733326	left	right
cylinder	test	1	6	1	3.768	0		left	left
cylinder	test	2	6	1	2.8333	0		left	right
cylinder	test	3	6	1	5.933	1	1.3332	left	right
cylinder	test	4	6	1	12.333	1	4.39996	left	right
cylinder	test	5	6	1	3.2666	0		right	right
cylinder	test	6	6	1	3.033	1	0.499995	right	left
cylinder	test	7	6	1	6.933	1	1.9999	right	left
cylinder	test	8	6	1	2.2	0		right	right
cylinder	test	9	6	1	2.5	0		right	left
cylinder	test	10	6	1	6.4	0		left	left
cylinder	test	11	6	1	5.367	0		left	left
cylinder	test	12	6	1	2.833	0		left	left
cylinder	test	13	6	1	7.566	1	2.63331	left	right
cylinder	test	14	6	0		1	4.23329	left
cylinder	test	15	6	1	5.567	0		left	right
cylinder	test	17	6	1	9.366	1	2.33331	right	right
cylinder	test	19	6	1	2.666	0		right	left
cylinder	test	20	6	1	12.133	1	2.59997	right	left
cylinder	test	21	6	1	60.5994	0		right	right
cylinder	test	0	7	1	3.333	0		right	right
cylinder	test	1	7	1	7.133	0		right	left
cylinder	test	2	7	1	41.6661	1	6.1666	right	right
cylinder	test	3	7	1	6.467	0		right	right
cylinder	test	4	7	1	7.8	1	1.49998	right	right
cylinder	test	5	7	1	4.2	0		left	right
cylinder	test	6	7	1	2.833	0		left	left
cylinder	test	7	7	1	4.3	0		left	left
cylinder	test	8	7	1	3	0		left	right
cylinder	test	9	7	1	2.6	0		left	left
cylinder	test	10	7	1	13.567	1	4.6663	right	left
cylinder	test	11	7	1	9.233	0		right	left
cylinder	test	12	7	1	2.867	0		right	left
cylinder	test	13	7	1	4.366	0		right	right
cylinder	test	14	7	0		0		right
cylinder	test	15	7	1	3.566	0		right	right
cylinder	test	17	7	1	5.166	0		left	right
cylinder	test	19	7	1	2.567	0		left	left
cylinder	test	20	7	1	5.434	0		right	right
cylinder	test	21	7	1	13.033	1	0.399996	left	left
cylinder	test	0	8	1	4.5	1	1.96665	left	right
cylinder	test	1	8	1	4.5	0		left	left
cylinder	test	2	8	1	9.8332	1	4.99995	left	right
cylinder	test	3	8	1	9.433	1	4.66662	left	right
cylinder	test	4	8	1	2.833	0		left	right
cylinder	test	5	8	1	3.7	0		right	right
cylinder	test	6	8	1	3.1	1	1.6666	right	left
cylinder	test	7	8	1	5.3999	1	2.63331	right	left
cylinder	test	8	8	1	3.467	0		right	right
cylinder	test	9	8	1	2.067	0		right	left
cylinder	test	10	8	1	7.267	1	1.13332	left	left
cylinder	test	11	8	1	4.467	0		left	left
cylinder	test	12	8	1	2.367	0		left	left
cylinder	test	13	8	1	3.6	0		left	right
cylinder	test	14	8	1	36.766	1	4.89995	left	right
cylinder	test	15	8	1	2.534	0		left	right
cylinder	test	17	8	1	4.766	1	0.533328	right	right
cylinder	test	19	8	1	3.2999	0		right	left
cylinder	test	20	8	1	6.5332	0		right	left
cylinder	test	21	8	1	4.367	0		right	right
cylinder	test	0	9	1	3.234	1	0.299997	left	right
cylinder	test	1	9	1	3.233	0		left	left
cylinder	test	2	9	1	8.3	1	4.3329	left	right
cylinder	test	3	9	1	5.7	1	1.33448	left	right
cylinder	test	4	9	1	3.0999	0		left	right
cylinder	test	5	9	1	18.099	1	13.9999	right	left
cylinder	test	6	9	1	3.633	1	1.53332	right	left
cylinder	test	7	9	1	4.4333	1	0.866658	right	left
cylinder	test	8	9	1	2.367	0		right	right
cylinder	test	9	9	1	2.533	0		right	left
cylinder	test	10	9	1	3.566	0		right	left
cylinder	test	11	9	1	4.467	0		right	left
cylinder	test	12	9	1	2.4997	0		right	left
cylinder	test	13	9	1	3.767	0		right	right
cylinder	test	14	9	1	12.966	1	2.73331	right	right
cylinder	test	15	9	1	5.533	1	2.56664	right	right
cylinder	test	17	9	1	8.8	1	2.3339	left	right
cylinder	test	19	9	1	2.867	0		left	left
cylinder	test	20	9	1	8.133	1	0.866658	left	left
cylinder	test	21	9	1	4.3999	1	0.966657	left	right
cylinder	test	0	10	1	4.266	0		right	right
cylinder	test	1	10	1	3.634	0		right	left
cylinder	test	2	10	1	5.733	1	2.53331	right	right
cylinder	test	3	10	1	4.233	0		right	right
cylinder	test	4	10	1	3.067	0		right	right
cylinder	test	5	10	1	9.0666	1	4.79995	left	left
cylinder	test	6	10	1	4.266	1	1.79998	left	left
cylinder	test	7	10	1	5.0666	1	1.43332	left	left
cylinder	test	8	10	1	3	0		left	right
cylinder	test	9	10	1	2.8	0		left	left
cylinder	test	10	10	1	4.2	0		left	left
cylinder	test	11	10	1	4.2	0		left	left
cylinder	test	12	10	1	2.7	0		left	left
cylinder	test	13	10	1	3.634	0		left	right
cylinder	test	14	10	1	8.399	1	1.99998	left	left
cylinder	test	15	10	1	4.2	0		left	right
cylinder	test	17	10	1	6	0		right	right
cylinder	test	19	10	1	8.767	1	3.6664	right	right
cylinder	test	20	10	1	4.567	0		right	right
cylinder	test	21	10	1	4.3333	0		right	right
